# Supplementary material
Source: publisher figshare collection journal article supplement (https://frontiersin.figshare.com/ndownloader/files/31095358)
Supplement: Supplementary file [file 31095358]

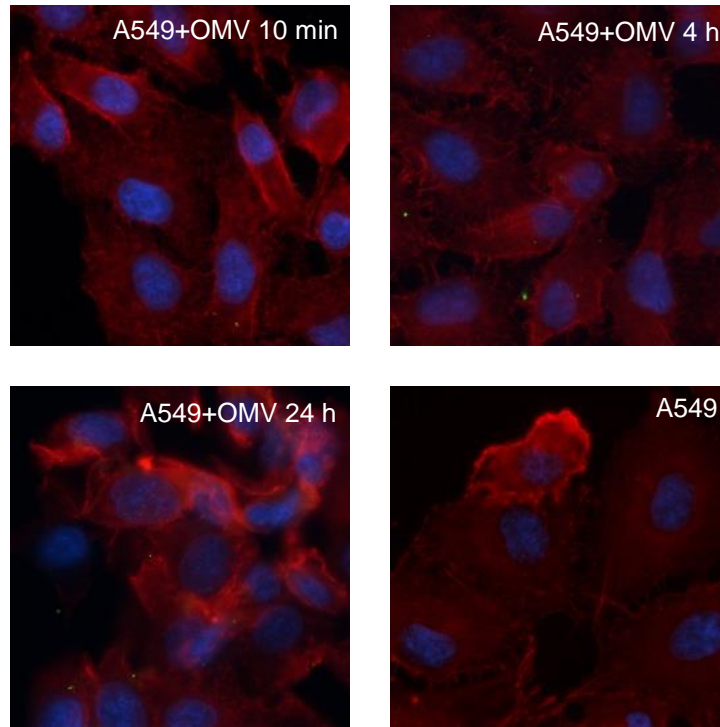

**Supplementary Figure 1:** Fluorescence microscopy of lung epithelial cell line A549 co-incubated with Ft-OMV for 10 min, 4 and 24 h at 37 °C. The Ft-OMV were visualized by immunostaining with purified immune rabbit polyclonal anti-*F. tularensis* serum, followed by AlexFluor™ 488 anti-rabbit IgG (green signal), actin was stained with Phalloidin-TRITC (red signal) and cell nuclei with DAPI (blue signal). Untreated A549 cells are shown as control. The samples were observed using the 60x objective.
